# Supplementary material
Source: MDPI journal article supplement (https://www.mdpi.com/2297-8739/10/9/500)
Supplement: s1 [file s1]

# Comprehensive profiling of terpenes and terpenoids in different cannabis strains using GC×GC-TOFMS

Jasmeen Kaur <sup>1</sup>, Ning Sun <sup>2</sup> and Jane E. Hill <sup>1,2,\*</sup>

<sup>1</sup>Department of Chemical and Biological Engineering, University of British Columbia, 2360 E Mall, Vancouver, BC V6T 1Z3, Canada.

<sup>2</sup>School of Biomedical Engineering, University of British Columbia, 251 - 2222 Health Sciences Mall, Vancouver, BC V6T 1Z3, Canada.

\* Correspondence: jane.hill@ubc.ca; Tel.: +1 604-822-3238

**Table S1.** List of terpenes in the standard mixtures.

| S. No. * | Standard mixture | Standard name                 | Chemical formula                  | Chemical class |
|----------|------------------|-------------------------------|-----------------------------------|----------------|
| 1        | Can-Terp Mix 2H  | $\alpha$ -Pinene              | C <sub>10</sub> H <sub>16</sub>   | Monoterpene    |
| 2        | Can-Terp Mix 1H  | Camphene                      | C <sub>10</sub> H <sub>16</sub>   | Monoterpene    |
| 3        | Can-Terp Mix 2H  | Sabinene                      | C <sub>10</sub> H <sub>16</sub>   | Monoterpene    |
| 4        | Can-Terp Mix 1H  | $\beta$ -Myrcene              | C <sub>10</sub> H <sub>16</sub>   | Monoterpene    |
| 5        | Can-Terp Mix 2H  | $\beta$ -Pinene               | C <sub>10</sub> H <sub>16</sub>   | Monoterpene    |
| 6        | Can-Terp Mix 1H  | $\alpha$ -Phellandrene        | C <sub>10</sub> H <sub>16</sub>   | Monoterpene    |
| 7        | Can-Terp Mix 1H  | 3-Carene                      | C <sub>10</sub> H <sub>16</sub>   | Monoterpene    |
| 8        | Can-Terp Mix 2H  | $\alpha$ -Terpinene           | C <sub>10</sub> H <sub>16</sub>   | Monoterpene    |
| 9        | Can-Terp Mix 2H  | D-Limonene                    | C <sub>10</sub> H <sub>16</sub>   | Monoterpene    |
| 10       | Can-Terp Mix 1H  | Eucalyptol                    | C <sub>10</sub> H <sub>18</sub> O | Monoterpenoid  |
| 11       | Can-Terp Mix 1H  | Ocimene                       | C <sub>10</sub> H <sub>16</sub>   | Monoterpene    |
| 12       | Can-Terp Mix 2H  | $\gamma$ -Terpinene           | C <sub>10</sub> H <sub>16</sub>   | Monoterpene    |
| 13       | Can-Terp Mix 2H  | Sabinene hydrate              | C <sub>10</sub> H <sub>18</sub> O | Monoterpenoid  |
| 14       | Can-Terp Mix 2H  | Terpinolene                   | C <sub>10</sub> H <sub>16</sub>   | Monoterpene    |
| 15       | Can-Terp Mix 1H  | Linalool                      | C <sub>10</sub> H <sub>18</sub> O | Monoterpenoid  |
| 16       | Can-Terp Mix 1H  | (+)-Fenchone                  | C <sub>10</sub> H <sub>16</sub> O | Monoterpenoid  |
| 17       | Can-Terp Mix 2H  | L-(-)-Fenchone                | C <sub>10</sub> H <sub>16</sub> O | Monoterpenoid  |
| 18       | Can-Terp Mix 2H  | (1R)-Endo-(+)-Fenchyl alcohol | C <sub>10</sub> H <sub>18</sub> O | Monoterpenoid  |
| 19       | Can-Terp Mix 2H  | $\beta$ -Terpineol            | C <sub>10</sub> H <sub>18</sub> O | Monoterpenoid  |
| 20       | Can-Terp Mix 1H  | Isopulegol                    | C <sub>10</sub> H <sub>18</sub> O | Monoterpenoid  |
| 21       | Can-Terp Mix 1H  | Camphor                       | C <sub>10</sub> H <sub>16</sub> O | Monoterpenoid  |
| 22       | Can-Terp Mix 2H  | (1S)-(-)-Camphor              | C <sub>10</sub> H <sub>16</sub> O | Monoterpenoid  |
| 23       | Can-Terp Mix 2H  | (1R)-(+)-Camphor              | C <sub>10</sub> H <sub>16</sub> O | Monoterpenoid  |
| 24       | Can-Terp Mix 1H  | Isoborneol                    | C <sub>10</sub> H <sub>18</sub> O | Monoterpenoid  |
| 25       | Can-Terp Mix 2H  | (+)-Borneol                   | C <sub>10</sub> H <sub>18</sub> O | Monoterpenoid  |
| 26       | Can-Terp Mix 1H  | Hexahydrothymol               | C <sub>10</sub> H <sub>20</sub> O | Monoterpenoid  |
| 27       | Can-Terp Mix 2H  | (-)-Borneol                   | C <sub>10</sub> H <sub>18</sub> O | Monoterpenoid  |
| 28       | Can-Terp Mix 2H  | $\alpha$ -Terpineol           | C <sub>10</sub> H <sub>18</sub> O | Monoterpenoid  |
| 29       | Can-Terp Mix 1H  | Nerol                         | C <sub>10</sub> H <sub>18</sub> O | Monoterpenoid  |

|    |                 |                             |                                                |                 |
|----|-----------------|-----------------------------|------------------------------------------------|-----------------|
| 30 | Can-Terp Mix 2H | Geraniol                    | C <sub>10</sub> H <sub>18</sub> O              | Monoterpenoid   |
| 31 | Can-Terp Mix 2H | (+)-Pulegone                | C <sub>10</sub> H <sub>16</sub> O              | Monoterpenoid   |
| 32 | Can-Terp Mix 1H | Geranyl acetate             | C <sub>12</sub> H <sub>20</sub> O <sub>2</sub> | Monoterpenoid   |
| 33 | Can-Terp Mix 1H | Farnesene (isomer1)         | C <sub>15</sub> H <sub>24</sub>                | Sesquiterpene   |
| 34 | Can-Terp Mix 2H | $\alpha$ -Cedrene           | C <sub>15</sub> H <sub>24</sub>                | Sesquiterpene   |
| 35 | Can-Terp Mix 1H | <i>trans</i> -Caryophyllene | C <sub>15</sub> H <sub>24</sub>                | Sesquiterpene   |
| 36 | Can-Terp Mix 1H | Farnesene (isomer2)         | C <sub>15</sub> H <sub>24</sub>                | Sesquiterpene   |
| 37 | Can-Terp Mix 2H | Humulene                    | C <sub>15</sub> H <sub>24</sub>                | Sesquiterpene   |
| 38 | Can-Terp Mix 1H | Valencene                   | C <sub>15</sub> H <sub>24</sub>                | Sesquiterpene   |
| 39 | Can-Terp Mix 1H | <i>cis</i> -Nerolidol       | C <sub>15</sub> H <sub>26</sub> O              | Sesquiterpenoid |
| 40 | Can-Terp Mix 2H | <i>trans</i> -Nerolidol     | C <sub>15</sub> H <sub>26</sub> O              | Sesquiterpenoid |
| 41 | Can-Terp Mix 1H | Caryophyllene oxide         | C <sub>15</sub> H <sub>26</sub> O              | Sesquiterpenoid |
| 42 | Can-Terp Mix 2H | Guaiol                      | C <sub>15</sub> H <sub>26</sub> O              | Sesquiterpenoid |
| 43 | Can-Terp Mix 1H | Cedrol                      | C <sub>15</sub> H <sub>26</sub> O              | Sesquiterpenoid |
| 44 | Can-Terp Mix 1H | $\alpha$ -Bisabolol         | C <sub>15</sub> H <sub>26</sub> O              | Sesquiterpenoid |

\* The compounds are listed as they appear in the GC×GC-TOFMS chromatogram of the standard mixture in Figure 1a.

**Table S2.** List of contaminants removed during data analysis.

| Contaminant name                                     |
|------------------------------------------------------|
| Benzaldehyde                                         |
| Benzaldehyde, 3-benzyloxy-2-fluoro-4-methoxy-        |
| Benzene, 1,3-dimethyl-                               |
| Benzene, [3-(2-cyclohexylethyl)-6-cyclopentylhexyl]- |
| Benzyl oxy tridecanoic acid                          |
| Cyclohexane, 1,3-dimethyl-, cis-                     |
| Cyclohexane, ethyl-                                  |
| Cyclohexane, 1,2,3-trimethyl-                        |
| Cyclohexane, 1,2,4-trimethyl-                        |
| Cyclopropane, 1-butyl-1-methyl-2-propyl-             |
| Dodecane, 1-fluoro-                                  |
| 1-Dodecanol, 3,7,11-trimethyl-                       |
| Ethylbenzene                                         |
| 2-Methylthiolane, S,S-dioxide                        |
| Octane, 1,1'-oxybis-                                 |
| 1-Octanol, 2-butyl-                                  |
| Pentalene, octahydro-, cis-                          |
| 1-Tetradecanol                                       |
| Toluene                                              |
| 2-Undecanethiol, 2-methyl-                           |
| p-Xylene                                             |
| Sil                                                  |
